# Supplementary material
Source: PubMed Central journal article supplement (PMC385398)
Supplement: jcinvest_113_8_1234__2.pdf [file jcinvest_113_8_1234__2.pdf]

**Table 2 (supplementary data).** Clinical and Pathological features of FTA and FTC analyzed by immunohistochemistry to DDIT3 and ARG2.

| Case No.            | FNA <sup>A</sup> | SEX <sup>B</sup> | AGE | DDIT3 <sup>E</sup> | ARG2 <sup>E</sup> |
|---------------------|------------------|------------------|-----|--------------------|-------------------|
| <b>FTA (n = 32)</b> |                  |                  |     |                    |                   |
| 1                   | SUS              | F                | 23  | (-)                | (-)               |
| 2                   | BNG              | F                | 54  | (-)                | (-)               |
| 3                   | SUS              | F                | 30  | (-)                | (-)               |
| 4                   | SUS              | F                | 42  | (-)                | (-)               |
| 5                   | SUS              | F                | 39  | (-)                | (-)               |
| 6                   | SUS              | F                | 39  | (-)                | (-)               |
| 7                   | SUS              | F                | 27  | (-)                | (-)               |
| 8                   | SUS              | F                | 39  | (-)                | (-)               |
| 9 <sup>C</sup>      | SUS              | F                | 16  | (++)               | (+)               |
| 10                  | BNG              | F                | 47  | (-)                | (-)               |
| 11                  | SUS              | F                | 51  | (-)                | (-)               |
| 12                  | SUS              | F                | 17  | (-)                | (-)               |
| 13                  | SUS              | M                | 42  | (-)                | (-)               |
| 14                  | NA               | F                | 54  | (-)                | (-)               |
| 15                  | SUS              | M                | 74  | (-)                | (-)               |
| 16                  | NA               | F                | 22  | (-)                | (-)               |
| 17                  | NA               | M                | 51  | (-)                | (-)               |
| 18                  | SUS              | M                | 53  | (-)                | (-)               |
| 19                  | SUS              | F                | 38  | (-)                | (-)               |
| 20                  | NA               | M                | 55  | (-)                | (-)               |
| 21                  | SUS              | F                | 37  | (-)                | (-)               |
| 22                  | SUS              | F                | 38  | (-)                | (-)               |
| 23                  | SUS              | F                | 49  | (-)                | (-)               |
| 24                  | SUS              | F                | 62  | (-)                | (-)               |
| 25                  | NA               | F                | 34  | (-)                | (-)               |
| 26                  | BNG              | F                | 43  | (-)                | (-)               |
| 27                  | NA               | F                | 29  | (-)                | (-)               |
| 28                  | NA               | F                | 72  | (-)                | (-)               |
| 29                  | NA               | F                | NA  | (-)                | (-)               |
| 30                  | NA               | M                | 38  | (-)                | (-)               |
| 31 <sup>D</sup>     | SUS              | F                | 34  | (+)                | (++)              |
| 32 <sup>D</sup>     | SUS              | F                | 29  | (+)                | (++)              |
| <b>FTC (n = 27)</b> |                  |                  |     |                    |                   |
| 33                  | SUS              | F                | 68  | (+++)              | (+++)             |
| 34                  | SUS              | F                | 17  | (++)               | (+++)             |
| 35                  | SUS              | F                | 49  | (+++)              | (+++)             |
| 36                  | SUS              | F                | 61  | (+++)              | (+++)             |
| 37 <sup>E</sup>     | SUS              | F                | 33  | (-)                | (-)               |
| 38                  | SUS              | F                | 61  | (+++)              | (+++)             |
| 39                  | NA               | F                | 21  | (++)               | (++)              |
| 40 <sup>F</sup>     | SUS              | M                | 75  | (-)                | (++)              |
| 41 <sup>E</sup>     | SUS              | F                | 23  | (-)                | (-)               |
| 42                  | SUS              | M                | 62  | (+++)              | (+++)             |
| 43 <sup>E</sup>     | CA               | M                | 66  | (-)                | (-)               |
| 44                  | CA               | M                | 75  | (+++)              | (++)              |
| 45                  | NA               | F                | 60  | (+++)              | (+++)             |
| 46                  | NA               | F                | 52  | (++)               | (++)              |
| 47                  | NA               | F                | 76  | (++)               | (++)              |
| 48                  | SUS              | F                | 47  | (+++)              | (+++)             |
| 49                  | NA               | F                | 75  | (+++)              | (+++)             |
| 50                  | SUS              | M                | 36  | (+++)              | (+++)             |
| 51                  | NA               | F                | NA  | (+++)              | (+++)             |
| 52 <sup>E</sup>     | SUS              | F                | 24  | (++)               | (-)               |
| 53                  | NA               | F                | 59  | (+++)              | (+++)             |
| 54                  | SUS              | F                | 69  | (+++)              | (++)              |
| 55                  | NA               | F                | 38  | (++)               | (+++)             |
| 56                  | NA               | M                | 31  | (+++)              | (+++)             |
| 57                  | SUS              | F                | 66  | (++)               | (+++)             |
| 58                  | SUS              | F                | 59  | (+++)              | (++)              |
| 59                  | SUS              | F                | 34  | (+++)              | (+++)             |

<sup>A</sup> Results obtained from FNA biopsy. (SUS) suspicious, non-available (NA), cancer (CA) and benign (BNG).

<sup>B</sup> Female (F) and Male (M).

<sup>C</sup> Atypical adenoma <sup>D</sup> Hürthle cell adenoma. <sup>E</sup> Minimally invasive. <sup>F</sup> Moderately differentiated

<sup>G</sup> Negative (-), Positive (+). The intensity was scored into three categories: weak (+), moderate (++), strong (+++)
